# Supplementary material for: Water and Sediment Bacterial Communities in a Small Mediterranean, Oxygen-Stratified, Saline Lake (Lake Alboraj, SE Spain)
Source: MDPI journal article supplement (doi:10.3390/app11146309), 2021-07-08
Supplement: s1 [file s1]

# Water and Sediment Bacterial Communities in a Small Mediterranean, Oxygen-Stratified, Saline Lake (Lake Alboraj, SE Spain)

Yolanda Espín \*, Alfonso Menchén, José Luis Moreno, David Sanz, Manuel Álvarez-Ortí, José Antonio Fernández and Juan José Gómez-Alday

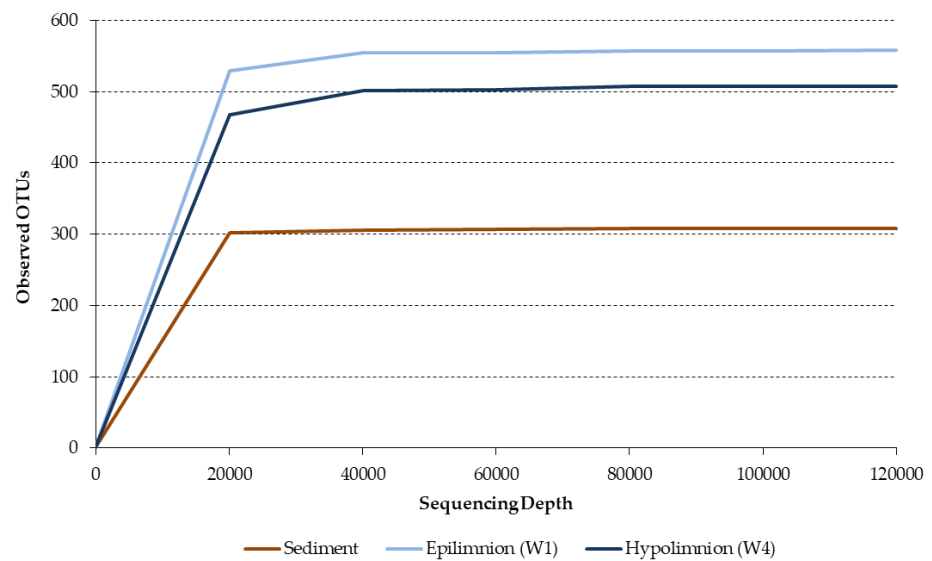

**Figure S1.** Observed OTUs alpha rarefaction curve. Graphic shows a flat portion, which represents sufficient depth of sequencing.

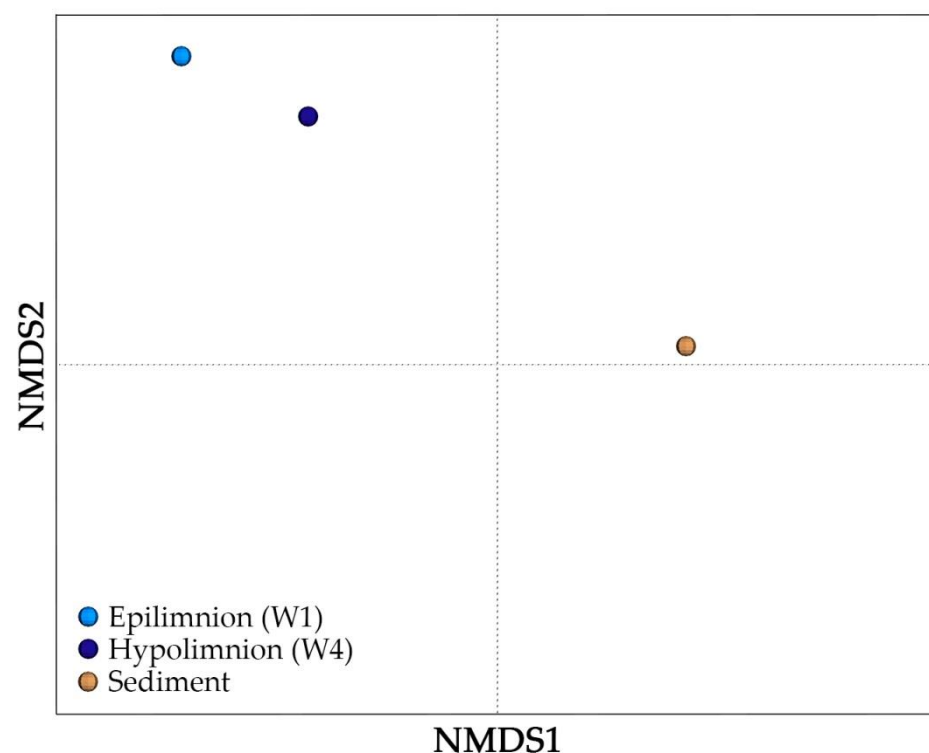

**Figure S2.** Non-metric multidimensional scaling (NMDS) analysis of the weighted UniFrac distance of water and sediment samples from Lake Alboraj. NMDS spots (stress 0.17) describe dissimilarity of species composition between epilimnion, hypolimnion and sediment samples.
